# Supplementary material for: Associations of Alzheimer's-related plasma biomarkers with cognitive decline in Parkinson's disease
Source: PubMed Central journal article supplement (PMC10576723; doi:10.1007/s00415-023-11875-z), 2023-07-22
Supplement: 415_2023_11875_MOESM2_ESM.pdf [file 415_2023_11875_MOESM2_ESM.pdf]

**Supplementary Table 1.**

The clinical characteristics and levels of plasma biomarkers of the participants in the HC, PDND and PDD group.

| <b>Characteristics</b>                        | <b>HC (N=38)</b> | <b>PDND (N=49)</b> | <b>PDD (N=21)</b> | <b>HC vs. PDND</b> | <b>HC vs. PDD</b> | <b>PDND vs. PDD</b> |
|-----------------------------------------------|------------------|--------------------|-------------------|--------------------|-------------------|---------------------|
|                                               | mean ± SD        | mean ± SD          | mean ± SD         |                    |                   |                     |
| <b>Age at examination (years)<sup>a</sup></b> | 68.4 ± 4.90      | 68.0 ± 8.48        | 73.9 ± 6.74       | 0.9516             | <b>0.0016</b>     | <b>0.0104</b>       |
| <b>Sex (Male / female)<sup>b</sup></b>        | 19/19            | 28/21              | 28/21             | 0.5241             | 0.4243            | 0.7948              |
| <b>Age at onset (years)<sup>c</sup></b>       | -                | 60.0 ± 10.3        | 67.1 ± 6.28       | -                  | -                 | <b>0.0127</b>       |
| <b>Disease duration (months)<sup>c</sup></b>  | -                | 95.7 ± 51.1        | 80.8 ± 49.0       | -                  | -                 | 0.2000              |
| <b>Education (years)<sup>a</sup></b>          | 13.9 ± 1.80      | 13.3 ± 2.24        | 11.4 ± 2.89       | 0.3765             | <b>0.0013</b>     | <b>0.0121</b>       |
| <b>LEDD (mg)<sup>c</sup></b>                  | -                | 635 ± 335          | 673 ± 355         | -                  | -                 | 0.7680              |
| <b>MDS-UPDRS I<sup>c</sup></b>                | -                | 10.0 ± 5.65        | 12.6 ± 6.01       | -                  | -                 | 0.0959              |
| <b>MDS-UPDRS II<sup>c</sup></b>               | -                | 14.7 ± 8.03        | 16.1 ± 9.20       | -                  | -                 | 0.6524              |
| <b>MDS-UPDRS III<sup>c</sup></b>              | -                | 34.6 ± 16.2        | 38.1 ± 16.8       | -                  | -                 | 0.3997              |
| <b>MDS-UPDRS IV<sup>c</sup></b>               | -                | 5.53 ± 4.29        | 5.11 ± 5.01       | -                  | -                 | 0.6934              |
| <b>HY<sup>c</sup></b>                         | -                | 2.96 ± 0.999       | 3.48 ± 1.08       | -                  | -                 | <b>0.0372</b>       |
| <b>PDQ-39 SI<sup>c</sup></b>                  | -                | 28.7 ± 16.1        | 33.3 ± 14.9       | -                  | -                 | 0.2676              |

|                                       |                 |                 |                 |               |               |               |
|---------------------------------------|-----------------|-----------------|-----------------|---------------|---------------|---------------|
| SCOPA-AUTO <sup>c</sup>               | -               | 14.9 ± 7.93     | 15.3 ± 8.46     | -             | -             | 0.8172        |
| GDS-15 <sup>a</sup>                   | 2.55 ± 2.16     | 6.27 ± 3.27     | 8.43 ± 4.34     | < 0.0001      | < 0.0001      | 0.0932        |
| J-QUIP <sup>c</sup>                   | -               | 0.653 ± 0.969   | 0.667 ± 1.02    | -             | -             | 0.9476        |
| RBDSQ-J <sup>c</sup>                  | -               | 4.88 ± 2.85     | 6.10 ± 3.06     | -             | -             | 0.0946        |
| ESS <sup>c</sup>                      | -               | 9.24 ± 6.32     | 9.10 ± 4.82     | -             | -             | 0.8021        |
| OSIT-J score <sup>c</sup>             | -               | 4.29 ± 2.53     | 1.90 ± 1.62     | -             | -             | <b>0.0003</b> |
| MMSE <sup>a</sup>                     | 28.7 ± 1.19     | 27.9 ± 1.80     | 21.4 ± 5.15     | 0.1190        | < 0.0001      | < 0.0001      |
| ACE-R total score <sup>a</sup>        | 95.0 ± 2.99     | 89.3 ± 8.88     | 68.3 ± 17.4     | <b>0.0045</b> | < 0.0001      | < 0.0001      |
| MoCA-J total score <sup>a</sup>       | 24.8 ± 2.67     | 23.0 ± 3.30     | 16.6 ± 5.85     | <b>0.0234</b> | < 0.0001      | < 0.0001      |
| FAB <sup>c</sup>                      | -               | 13.7 ± 2.51     | 11.4 ± 2.91     | -             | -             | <b>0.0020</b> |
| GFAP (pg/mL) <sup>a</sup>             | 115 ± 39.1      | 127 ± 60.0      | 185 ± 60.7      | 0.8870        | < 0.0001      | <b>0.0008</b> |
| NfL (pg/mL) <sup>a</sup>              | 13.9 ± 4.45     | 31.1 ± 21.3     | 59.7 ± 44.0     | < 0.0001      | < 0.0001      | <b>0.0291</b> |
| p-tau181 (pg/mL) <sup>a</sup>         | 1.62 ± 0.684    | 2.02 ± 1.28     | 2.46 ± 1.45     | 0.6331        | <b>0.0472</b> | 0.2616        |
| Aβ <sub>42/40</sub> <sup>a</sup>      | 0.0646 ± 0.0139 | 0.0733 ± 0.0119 | 0.0653 ± 0.0133 | <b>0.0001</b> | 0.9266        | <b>0.0195</b> |
| Aβ <sub>40</sub> (pg/mL) <sup>a</sup> | 100 ± 15.8      | 92.0 ± 17.0     | 105 ± 23.9      | 0.1449        | 0.8235        | 0.1155        |

|                                  |             |             |             |        |        |        |
|----------------------------------|-------------|-------------|-------------|--------|--------|--------|
| <b>Aβ42 (pg/mL) <sup>a</sup></b> | 6.43 ± 1.49 | 6.71 ± 1.60 | 6.78 ± 1.85 | 0.7599 | 0.7131 | 0.9450 |
|----------------------------------|-------------|-------------|-------------|--------|--------|--------|

HC, healthy control; PDND, non-demented Parkinson's disease; PDD, Parkinson's disease dementia; LEDD, Levodopa equivalent daily dose; MDS-UPDRS, Movement Disorder Society's Unified Parkinson's Disease Rating Scale; HY, Hoehn-Yahr scale; PDQ-39 SI, Parkinson's Disease Questionnaire-39 Summary Index; SCOPA-AUT, Scales for Outcomes in Parkinson's Disease-Autonomic; GDS-15, Geriatric Depression Scale-15; J-QUIP, Japanese version of the Questionnaire for Impulsive-Compulsive Disorders in Parkinson's Disease; RBDSQ-J, Japanese version of the REM Sleep Behavior Disorder Screening Questionnaire; ESS, Epworth Sleepiness Scale; OSIT-J, Odor Stick Identification Test for Japanese; MMSE, Mini-Mental State Examination; ACE-R, Addenbrooke's Cognitive Examination-Revised; MoCA-J, Japanese version of the Montreal Cognitive Assessment; FAB, Frontal Assessment Battery; GFAP, glial fibrillar acidic protein; NfL, neurofilament light chain; p-tau, phosphorylated tau; Aβ, amyloid beta.

<sup>a</sup> Kruskal-Wallis test followed by post hoc Steel-Dwass multiple comparison tests.

<sup>b</sup> Fisher's exact test.

<sup>c</sup> Wilcoxon rank sum test.

\*Bold letters indicate a statistically significant difference.
