# Supplementary material for: Associations of Alzheimer's-related plasma biomarkers with cognitive decline in Parkinson's disease
Source: Springer Nature journal article supplement (doi:10.1007/s00415-023-11875-z), 2023-07-22
Supplement: MOESM1 [file 25834342]

**a****PD cases**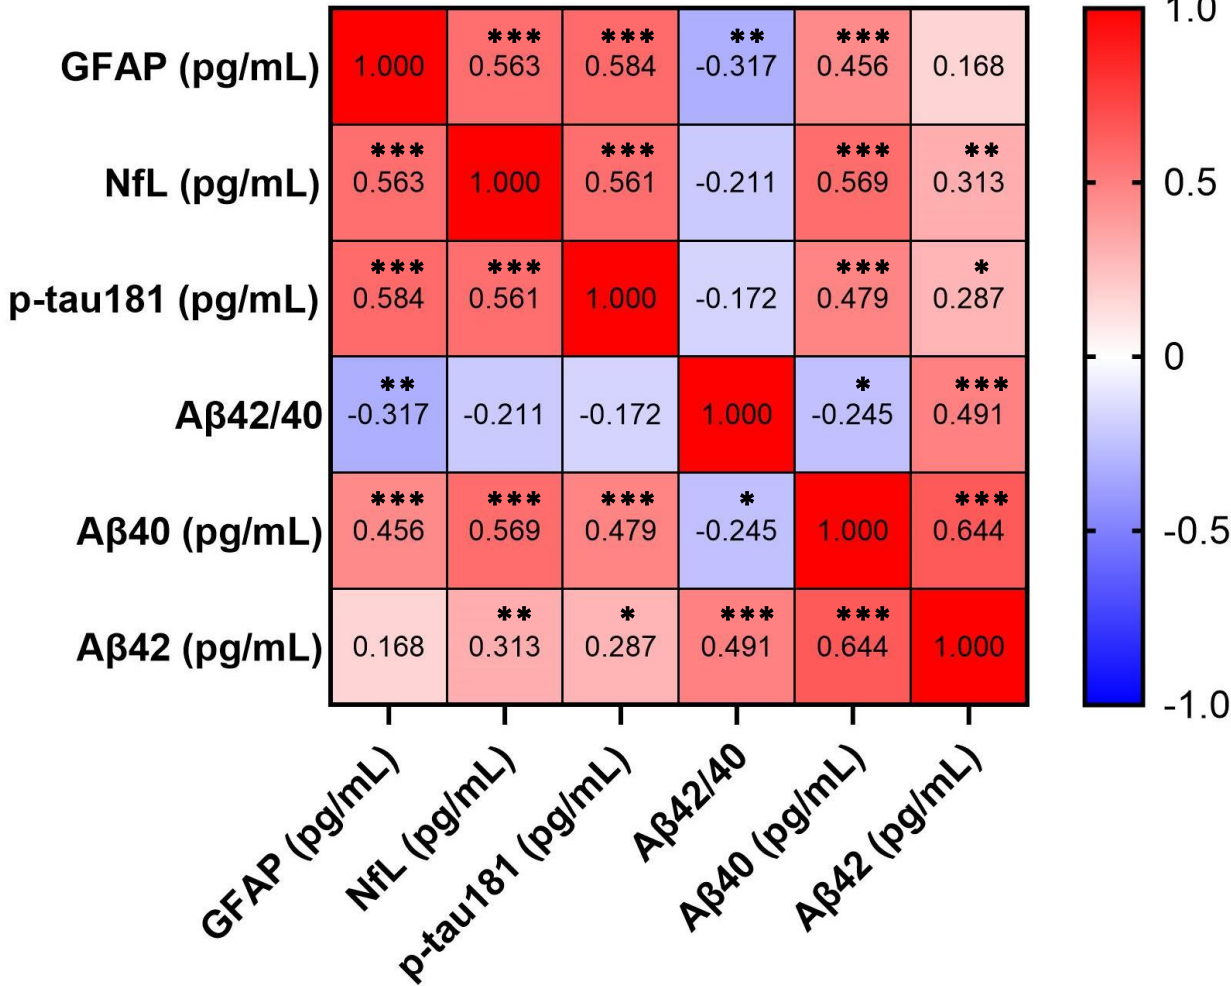**b****Healthy controls**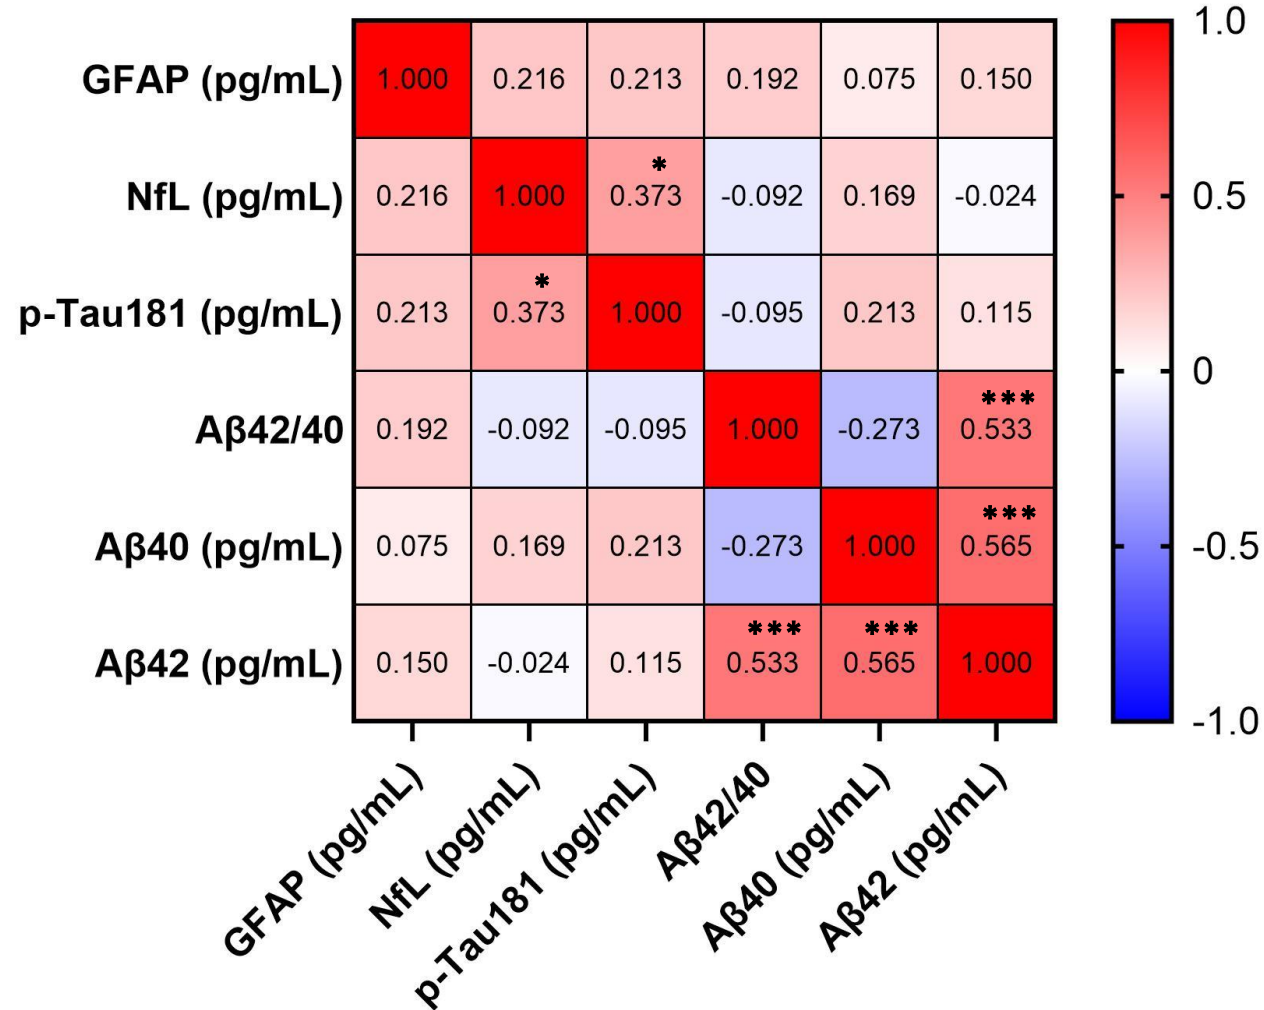

**Supplementary Fig. 1.** Spearman's rank correlation between plasma biomarkers in each group. **a** Spearman's rank correlation between plasma biomarkers in the PD group. **b** Spearman's rank correlation between plasma biomarkers in the HC group. Spearman's rank correlation test was used to determine significant correlations. PD, Parkinson's disease; HC, healthy control; GFAP, glial fibrillary acidic protein; NfL, neurofilament light chain; p-tau, phosphorylated tau; A $\beta$ , amyloid beta. \*  $p < 0.05$ ; \*\*  $p < 0.01$ ; \*\*\*  $p < 0.001$ .
